## Nitrous Oxide and Air-filled Balloon-tipped Catheters

Ronald Kaplan, M.D.,\* Michael D. Abramowitz, M.D.,† Burton S. Epstein, M.D.‡

The differential solubilities of gases permit nitrous oxide (N<sub>2</sub>O) diffusion into air-filled body cavities, increasing their size and/or pressure. An air-filled balloon-tipped catheter represents a body cavity that may be affected by the diffusion of N<sub>2</sub>O, and could account for the authors' clinical observation that more gas was aspirated than injected during insertion of Swan-Ganz (S-G) catheters in patients receiving N<sub>2</sub>O anesthesia. An accompanying increase in balloon diameter could conceivably account for difficulties in floating the tip into the pulmonary outflow tract. To help substantiate these observations, balloon volumes of three S-G catheters were measured at 0.5, 1, 2, 3, 4, 5, 10, 20, and 30 min in various N<sub>2</sub>O and oxygen mixtures, and the diameters of the balloon were compared with published diameters of pulmonary outflow tracts. The volume changes were near maximum between 5-10 min, increasing to 30 to 150 per cent depending on the N<sub>2</sub>O concentration. The increases in balloon diameter, when compared to pediatric pulmonary outflow tract diameters, could account for difficulties in passage of the catheter tip through the pulmonary outflow tract. These findings suggest that manipulation of S-G catheters under N<sub>2</sub>O anesthesia should be done with intermittent deflation of the balloon every few minutes. (Key words: Anesthetic gases: nitrous oxide. Equipment: catheters, Swan-Ganz.)

DURING THE PLACEMENT of Swan-Ganz (S-G) catheters in patients receiving nitrous oxide (N<sub>2</sub>O) anesthesia, we have observed that more gas volume was withdrawn from the balloon than was initially injected. We postulated that N<sub>2</sub>O had diffused into the balloon causing an increase in volume. This study was designed to evaluate the effect of N<sub>2</sub>O on the volume of the air space of the S-G catheter balloon.

### Materials and Methods

Calibrated flow meters were used to deliver air or N<sub>2</sub>O/oxygen (O<sub>2</sub>) mixtures of 0/100 per cent, 25/75 per cent, 34/66 per cent, 50/50 per cent, 66/34 per cent, and 75/25 per cent into a 1.5 l container in which

a #7-French S-G catheter§ was placed. To verify the composition of gases being delivered an O<sub>2</sub> analyzer¶ was used; total flow rates of 1-2 l/min were used. The S-G balloon injection port was connected to a transducer\*\* and pressure amplifier with digital display.†† Prior to each inflation, the S-G balloon was deflated until the amplifier reading was zero. This allowed return of the balloon to a neutral deflated configuration preventing excessive aspiration.

One ml ( $\pm 0.025$  ml) of air was injected into the S-G balloon with a precision gas tight syringe.‡‡ The same syringe was used to measure the volume aspirated from the S-G balloon. The time period from injection to aspiration was measured with a stopwatch. The S-G balloon and transducer dome were cleared of residual N<sub>2</sub>O and O<sub>2</sub> by flushing with air between each determination. Balloon volume measurements were made with three different S-G catheters. Three measurements were made for each time interval.

The predicted increase in volume of the S-G balloon for the given concentration of N<sub>2</sub>O was calculated as follows: the maximal increase in volume of an air-filled space exposed to a N<sub>2</sub>O/O<sub>2</sub> mixture is

$$\frac{100}{100 - \text{per cent N}_2\text{O in the environment}}$$

which is the multiple of the original that can be achieved.<sup>1</sup> The value obtained from this calculation was compared to the maximal volumes measured experimentally.

### Results

The volume changes obtained from the three S-G balloons after exposure to various inflowing gas concentrations were compared to the predicted volume changes (fig. 1). The balloon volumes: 1) decreased in the air environment in all the catheters; 2) increased above the predicted values for all the catheters in the 25 per cent N<sub>2</sub>O/75 per cent O<sub>2</sub> environment; 3) in-

\* Assistant Professor of Anesthesiology, Albert Einstein College of Medicine.

† Assistant Professor of Anesthesiology.

‡ Professor of Anesthesiology.

Received from the Department of Anesthesiology and Child Health and Development, George Washington University Medical Center, and the Department of Anesthesiology, Children's Hospital National Medical Center, Washington, D. C. 20010. Accepted for publication December 16, 1980.

Address reprint requests to Dr. Ronald Kaplan: Adjunct Attending Anesthesiologist, Montefiore Hospital and Medical Center, 111 East 210th Street, Bronx, New York 10467.

§ Edwards Labs, Inc., Santa Ana, California.

¶ Polarographic O<sub>2</sub> Analyzer 401®, Jewell Electronic Instruments, Inc., Model 82 T.F.S. 100 UADC 2082 1935-145.

\*\* Bentley Trantec, Inc., Irvine, California.

†† Hewlett-Packard® Pressure Amplifier and Readout, Model 78201B.

‡‡ Hamilton Company, Reno, Nevada.

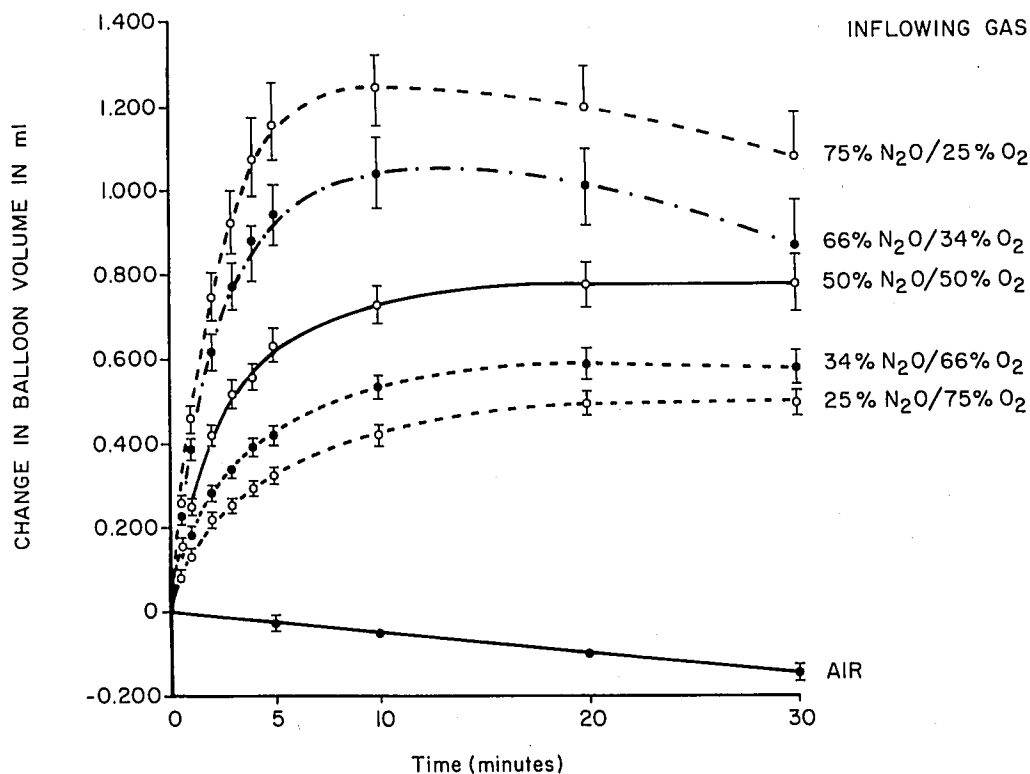

FIG. 1. The change from the initial 1-ml S-G balloon volume with time for the indicated inflowing gas concentration in three S-G catheters. The times listed are the duration of exposure of the air-filled balloon to the inflow mixture. The means  $\pm$  SEM of three determinations in each catheter at the specified time are plotted. The  $P < 0.001$  between the initial volume and each volume plotted, as per Student's  $t$  test.

creased above the predicted in two of three catheters in the 34 per cent N<sub>2</sub>O/66 per cent O<sub>2</sub> environment while the other catheter had the predicted volume; 4) had the predicted values for one catheter and below the predicted value for two catheters in the 50 per cent N<sub>2</sub>O/50 per cent O<sub>2</sub> environment; and 5) had less than the predicted volumes for all catheters in 66 per cent N<sub>2</sub>O/34 per cent O<sub>2</sub> and 75 per cent N<sub>2</sub>O and 25 per cent O<sub>2</sub> environments.

In a 100 per cent O<sub>2</sub> environment, all three S-G balloon volumes increased from 1 ml to a mean of 1.258, 1.350, and 1.500 ml each after 30 min. When the balloon was filled with 1 ml of gas of a composition identical to that in the environment (75 per cent N<sub>2</sub>O, 25 per cent O<sub>2</sub>) and observed for 30 min, two of the three showed decreases in their volumes (mean values of 0.650 and 0.792 ml). The other catheter did not change in volume.

TABLE 1. The Diameters of the Swan-Ganz Balloon with Corresponding Volumes Used for Inflation\*

| Inflation Volume (ml of air) | Balloon Diameter (mm) |
|------------------------------|-----------------------|
| 0.0                          | 2.34                  |
| 0.2                          | 2.34                  |
| 0.4                          | 2.41                  |
| 0.6                          | 2.67                  |
| 0.8                          | 2.92                  |
| 0.9                          | 9.91                  |
| 1.0                          | 10.16                 |
| 1.2                          | 11.56                 |
| 1.5                          | 12.70                 |

\* Data courtesy of P. J. Carter, Product Manager, Edwards Laboratories, Santa Ana, California.

Table 1 lists the diameters of the S-G balloon which correspond to a certain inflation volume. This shows a large and abrupt increase in balloon diameter between 0.8 and 0.9 ml of balloon volume.

Table 2 lists the relationships of age, height, and pulmonary ring diameter in children based on published data. Also included is the pulmonary ring diameter when the area of the normal pulmonary ring is reduced by one-half.

### Discussion

Expansion or increase in pressure of a gas containing space within the body by N<sub>2</sub>O has been well documented.<sup>1</sup> In the last few years interest in air-filled endotracheal tube cuffs has led to an appreciation of further potential hazards of N<sub>2</sub>O.<sup>2,3</sup> The potential adverse effects of N<sub>2</sub>O on the intraoperative use of S-G catheters have not been considered since their introduction into clinical practice. The #7-F S-G catheter was examined in this study because this is a commonly used size and proved sufficient to demonstrate the effects of N<sub>2</sub>O.

In this experiment, the S-G balloons were placed in a gas-filled container. This does not negate the relevance of the observations made in this study to the clinical situation where the S-G catheter is placed in blood. The principles of diffusion due to a concentration gradient across two compartments separated by a membrane would still apply. The design of this experiment allowed a simplified approach to the evaluation of the diffusion of N<sub>2</sub>O into S-G catheter balloons.

The onset of near maximal volume expansion occurred within 5–10 min following exposure to N<sub>2</sub>O; this is well within a clinically relevant time period for most users of S-G catheters. §§ At any given N<sub>2</sub>O/O<sub>2</sub> mixture, each of the S-G balloons evaluated expanded to a different degree. This is probably due to variations in the placement of the balloon on the catheter, the quality of the latex used for the balloon, and aging and deterioration of the latex. Properties of gaseous diffusion through synthetic material have been discussed elsewhere.<sup>2</sup>

Diffusion of air from within the balloon across a pressure gradient would explain the decrease of balloon volume in the air environment. ¶¶ The balloon volume increased above predicted values in the 25 per cent N<sub>2</sub>O/75 per cent O<sub>2</sub> and 34 per cent N<sub>2</sub>O/66 per cent O<sub>2</sub> environment, presumably due to oxygen diffusion into the balloon. This possible mechanism was verified when the balloon volume increased in the 100 per cent O<sub>2</sub> environment.

Changes in the S-G balloon volume is associated with a nonlinear change in its diameter (table 1). The diameters were determined for volumes up to 1.5 ml since this is the maximum inflation volume recommended by the manufacturer. Hurwitt<sup>4</sup> tabulated the normal measurements of the pulmonary valve in children from autopsy reports. Based on information described in Mercer's article,<sup>5</sup> a 50 per cent reduction in pulmonary ring area would produce only small hemodynamic changes and no change in exercise tolerance. It is therefore possible that pediatric patients with smaller than normal pulmonary ring diameters may not be detected prior to insertion of a S-G catheter, and that the magnitude of the volume increases measured in our study could cause problems in passage of the catheter into the outflow tract. (Compare tables 1 and 2.) In addition, if expansion occurred over and around the catheter tip, problems may possibly occur with reading waveforms or with movement of fluid through the orifice.<sup>6,7</sup>

Use of the inspired gas mixture as the inflation medium for the balloon to prevent balloon expansion was evaluated using 75 per cent N<sub>2</sub>O/25 per cent O<sub>2</sub>. In two of the catheters, the volume of the balloon (and hence the diameter) decreased when the inflowing gas was used as the inflation medium. The fact that one catheter showed little change was surprising. One would have anticipated (as with the studies using air only) that the gas, under higher pressure in the balloon, would diffuse out. These results support the use

§§ Barash PG, Katz JD, Cronan LM, et al: Intra-operative use and interpretation of Swan-Ganz catheter data. From the Department of Anesthesiology, Yale School of Medicine, New Haven, Connecticut. Printed and distributed by Edwards Labs, Inc., Santa Ana, California, 1976.

¶¶ Product description of Swan-Ganz flow directed monitoring catheters. Edwards Labs, Inc., Santa Ana, California, 1978.

TABLE 2. Relationship of Age and Height to Pulmonary Ring Diameter

| Age                  | Height (cm) | Pulmonary Ring Diameter |                        |
|----------------------|-------------|-------------------------|------------------------|
|                      |             | Normal (mm)*            | 50 Per Cent Area (mm)† |
| 3–6 mos              | 59          | 9                       | 7                      |
| 6–9 mos              | 65          | 10                      | 7–8                    |
| 9–18 mos             | 68–75       | 11                      | 8                      |
| 18–24 mos            | 81          | 12                      | 8–9                    |
| 2–3 yr               | 88          | 13                      | 9                      |
| 3–5 yr               | 97–105      | 14                      | 10                     |
| 5–7 yr               | 112–119     | 15                      | 10–11                  |
| 7–9 yr               | 124–128     | 16                      | 11–12                  |
| 9–11 yr              | 127–130     | 17                      | 12                     |
| 11–13 yr             | 138–151     | 18                      | 13‡                    |
| 13–14 yr (one case)  | 168         | 22                      | 16‡                    |
| 14–15 yr (one case)  | 165         | 20                      | 14‡                    |
| 15–16 yr (two cases) | 140         | 19                      | 13–14‡                 |

\* Data from Hurwitt<sup>4</sup> and † Mercer<sup>5</sup> except for ‡ values which were determined by the authors. Except where indicated in parentheses, the values were averages of five or more cases.

of the inspired gas mixture as the injectate to prevent balloon expansion when placing catheters in patients during N<sub>2</sub>O/O<sub>2</sub> anesthesia. Use of a liquid medium for balloon inflation as an alternative is not recommended by the manufacturer, as it may be difficult to withdraw all of the solution and thus the balloon may remain inflated. In addition, if liquid is used to inflate the balloon, the flow-directed character would be decreased since the density of any liquid would be closer to that of blood and the advantage of a gas-filled balloon would be negated in "floating" the catheter. In conclusion, if balloons are filled with air during placement under N<sub>2</sub>O anesthesia, they should be deflated every few minutes. This may be particularly critical in children.

The authors gratefully acknowledge the help and advice of Hideo Nagashima, M.D., in preparing this manuscript.

### References

1. Eger EI: Anesthetic uptake and action. Baltimore, Williams and Wilkins, 1974, pp 171–183
2. Stanley TH, Kawamura R, Graves C: Effects of nitrous oxide on the volume and pressure of endotracheal tube cuffs. ANESTHESIOLOGY 41:256–262, 1974
3. Ravenos B, Lindholm CE: Pressure and volume changes in tracheal tube cuffs during anesthesia. Acta Anesthesiol Scand 20:321–326, 1976
4. Hurwitt E: The size of the pulmonary valve. Bull Int Assoc Med Museums 27:170–172, 1947
5. Mercer JL: Acceptable size of the pulmonary valve ring in congenital cardiac defects. Ann Thorac Surg 20:567–570, 1975
6. Shin B, Mc Aslan TC, Ayella RJ: Problems with measurement using the Swan-Ganz catheter. ANESTHESIOLOGY 43:474–476, 1975
7. Shin B, Ayella RJ, Mc Aslan TC: Pitfalls of Swan-Ganz catheterization. Crit Care Med 5:125–127, 1977
